# Supplementary material for: Characterization of MET Alterations in 37 Gastroesophageal Cancer Cell Lines for MET-Targeted Therapy
Source: Preprints.org preprint supplement (doi:10.20944/preprints202405.1174.v1), 2024-05-17
Supplement: Supplementary file 1 [file supplementary]

**Table S1. Primer sequence for droplet digital PCR**

| **MMx no.** | **Gene** | **Probe sequence** | **Primer sequence** | |
| --- | --- | --- | --- | --- |
| **MMx1** | Mep15 | CCATCCTAACTAGTGGGGACTCTGA | Forward | AAGTGCAGTATCCTCTGACAGACA |
| Reverse | TGGACAGTATTTTGCAGTAATGG |
| AP3B1 | CACAGTTTGTCAGCCCTTGGA | Forward | CCACATGCTAACTCGATATGC |
| Reverse | GTGGAAGACTGTTCAACACTTACC |
| **MMx2** | RnaseP | ACGGCCAGCGAAGTGAGTTC | Forward | TGCCGGAGCTTGGAACAG |
| Reverse | AAAATGGGCGGAGGAGAGTAG |
| ElF2C1 | TCCAACCTCTGCCTCAAGATC | Forward | TGGTCAAGACCTCACCTCAG |
| Reverse | TGTTAATGCCACCAAGTTTGAC |
| **MMx3** | RPP30 | GGAATTGTCAAACTGACTCCTTTTCC | Forward | ATTTTAGGATGTTTTTCGCATCTG |
| Reverse | TGGCAGAATTTGTTCCTATGC |
| PPIA | TTGGATGGCAAGCATGTGGT | Forward | GTTGCCAGTCATAGTGATTGTTC |
| Reverse | GGCCTCCACAATATTCATGC |
